# Supplementary material for: Tuberculoid leprosy: An in vivo microvascular evaluation of cutaneous lesions
Source: PLoS One. 2020 Jan 13;15(1):e0227654. doi: 10.1371/journal.pone.0227654 (PMC6957169; doi:10.1371/journal.pone.0227654)
Supplement: S1 Table — (XLSX) [file pone.0227654.s001.xlsx]

## Sheet: Planilha1
Endothelial (PU/Hz)			Sympathetic (PU/Hz)				Myogenic (PU/Hz)		Respiratory (PU/Hz)		Cardiac (PU/Hz)
Patient	Control Skin	Skin Lesion	Control Skin		Skin Lesion		Control Skin	Skin Lesion	Control Skin	Skin Lesion	Control Skin	Skin Lesion
1	0.297297	0.206642	0.207207		0.184502		0.22973	0.276753	0.175676	0.221402	0.0900901	0.110701
2	0.404255	0.486842	0.184397		0.171053		0.134752	0.144737	0.163121	0.131579	0.113475	0.0657895
3	0.425641	0.183673	0.292308		0.102041		0.174359	0.132653	0.0564103	0.0714286	0.0512821	0.510204
4	0.238267	0.222222	0.187726		0.217593		0.249097	0.231482	0.209386	0.194444	0.115524	0.134259
5	0.415584	0.35514	0.363636		0.35514		0.136364	0.168224	0.0519481	0.0747663	0.0324675	0.046729
6	0.427185	0.288461	0.223301		0.25		0.184466	0.192308	0.0970874	0.173077	0.0679612	0.0961538
7	0.271493	0.283019	0.235294		0.283019		0.217195	0.188679	0.176471	0.150943	0.0995475	0.0943396
